# Supplementary material for: Molecular characterization of two novel intronic variants of NIPBL gene detected in unrelated Cornelia de Lange syndrome patients
Source: Springer Nature journal article supplement (doi:10.1186/s12881-018-0738-y), 2019-01-03
Supplement: MOESM1 [file 16373528]

```

NIPBL P2 .....

          1510      1520      1530      1540      1550      1560      1570      1580      1590      1600
NIPBL wt VVHLPSSEKD SNAEEDSNKK IDQDVVITNS YETAMRTAQN FLSIFLKKCG SKQGEEDYRP LFENFVQDLL STVNKPEWPA AELLLSLGR LLVHQFSNKS
NIPBL P1 .....
NIPBL P2 .....

          1610      1620      1630      1640      1650      1660      1670      1680      1690      1700
NIPBL wt TEMALRVASL DYLGTVAAARL RKDAVTSKMD QGSIERILKQ VSGGEDEIQQ LQKALLDYLD ENTETDPSLV FSRKFYIAQW FRDITLETEK AMKSQKDEES
NIPBL P1 .....
NIPBL P2 .....

          1710      1720      1730      1740      1750      1760      1770      1780      1790      1800
NIPBL wt SEGTHHAKEI ETTGQIMHRA ENRKKFLRSI IKTTPSQFST LKMNSDTVYD DDACLIVRYL ASMRPFAQSF DIYLQILRV LGENAIVRT KAMKCLSEVV
NIPBL P1 .....
NIPBL P2 .....

          1810      1820      1830      1840      1850      1860      1870      1880      1890      1900
NIPBL wt AVDPSILARL DMQRGVHGRL MDNSTSVREA AVELLGRFVL CRPQLAEQY DMLIERIILDT GISVRKRVIK ILRDICIEQP TFPKITEMCV KMIRRVNDEE
NIPBL P1 .....
NIPBL P2 .....

          1910      1920      1930      1940      1950      1960      1970      1980      1990      2000
NIPBL wt GIKKLVNETF QKLWTPPH NDKEAMTRKI LNTDVAAC RDTGYDWFEQ LLQNLKSEE DSSYKPVKKA CTQLVDNLVE HILKYEESLA DSDNKGVNSG
NIPBL P1 .....
NIPBL P2 .....

          2010      2020      2030      2040      2050      2060      2070      2080      2090      2100
NIPBL wt RLVACITTLF LFSKIRPQLM VKHAMTQPY LTKKSTQND FMVICNVAKI LELVVPLMEH PSETFLATIE EDLMLLIKY GMTVVQHCVS CLGAVVNKVT
NIPBL P1 .....
NIPBL P2 .....

          2110      2120      2130      2140      2150      2160      2170      2180      2190      2200
NIPBL wt QNKRFVWACF NRYYGAIKSL KSQHQEDPNN TSLLTNKPAL LRSLETVGAL CRHDFDLED FKGNSKVNK DKVLELLMYF TKHSDEEVQT KAIIGLGFAP
NIPBL P1 .....
NIPBL P2 .....

          2210      2220      2230      2240      2250      2260      2270      2280      2290      2300
NIPBL wt IQHPSILMEQ EVKLNLYNLL SDKNSSVNLK IQVLKLNQTY LQEEDTRMQQ ADRDWKKVAK QEDLKEMGDV SSGMSSSIMQ LYLKQVLEAF FHTQSSVRHF
NIPBL P1 .....
NIPBL P2 .....

          2310      2320      2330      2340      2350      2360      2370      2380      2390      2400
NIPBL wt ALNVIALTLN QGLIHPVQCV PYLIAMGTDK EPAMRNKADQ QLVEIDKKYA GFIIHKAVAG MKMSYQVQQA INTCLKDPVR GFRQDESSSA LCSHLYSMIR
NIPBL P1 .....
NIPBL P2 .....

          2410      2420      2430      2440      2450      2460      2470      2480      2490      2500
NIPBL wt GNRQHRRAFL ISLLNLFDDT AKTDVTMLLY IADNLACFPY QTQEEPLFIM HHIDITLSVS GSNLLQSFKE SMVKDKRKR KSSPSKENES SDSEEVSRP
NIPBL P1 .....
NIPBL P2 .....

          2510      2520      2530      2540      2550      2560      2570      2580      2590      2600
NIPBL wt RKSRRKVDSD SDSSEDDIN SVMKCLPENS APLIEFANVS QGILLLLMLK QHLKNLGFS DSKIQKYSFS ESAKVYDKAI NRKTGVHFHP KQTLDFLRS
NIPBL P1 .....
NIPBL P2 .....

          2610      2620      2630      2640      2650      2660      2670      2680      2690      2700
NIPBL wt MANSKITTEEV KRSIVKQYLD FKLMEHLDK DEEEEGEVV ASTNARNKAI TSLLGGGSPK NNTAAETEDD ESDGEDRGGG TSGSLRRSKR NSDSTELAAQ
NIPBL P1 .....
NIPBL P2 .....

          2710      2720      2730      2740      2750      2760      2770      2780      2790      2800
NIPBL wt MNEVDVMDV IAIACPKYKD RPQIARVVQK TSSGFSVQWM AGSYSGSWTE AKRRDGRKLV PWVDTIKESD IYKIALTS ANKLTNKVVQ TLRSLYAAKD
NIPBL P1 .....
NIPBL P2 .....

NIPBL wt ....
NIPBL P1 ----
NIPBL P2 ----

```
